1 **CaptureSeq: Capture-based enrichment of *cpn60* gene fragments empowers pan-Domain**  
2 **profiling of microbial communities without universal PCR**

3 Matthew G. Links<sup>1,2</sup>, Tim J. Dumonceaux<sup>3,4</sup>, Luke McCarthy<sup>5</sup>, Sean M. Hemmingsen<sup>5</sup>,  
4 Edward Topp<sup>6</sup>, Alexia Comte<sup>3</sup>, Jennifer R. Town<sup>3\*</sup>

5 <sup>1</sup>Department of Animal and Poultry Science, University of Saskatchewan, Saskatoon, SK,  
6 Canada

7 <sup>2</sup>Department of Computer Science, University of Saskatchewan, Saskatoon, SK, Canada

8 <sup>3</sup>Agriculture and Agri-Food Canada, Saskatoon Research and Development Centre, Saskatoon,  
9 SK, Canada

10 <sup>4</sup>Department of Veterinary Microbiology, University of Saskatchewan, Saskatoon, SK, Canada

11 <sup>5</sup>National Research Council of Canada, Saskatoon, SK, Canada

12 <sup>6</sup>Agriculture and Agri-Food Canada, London Research and Development Centre, London, ON,  
13 Canada

14 \*author for correspondence: [jennifer.town@agr.gc.ca](mailto:jennifer.town@agr.gc.ca)

15 Running title: Quantitative microbiome study using hybridization

16 DNA sequencing data associated with this work has been deposited at NCBI under BioProject  
17 PRJNA406970 and SRA deposits SRX3181274-SRX3181276 and SRX3187583-SRX3187601.

18 **ABSTRACT**

19           Molecular profiling of complex microbial communities has become the basis for  
20 examining the relationship between the microbiome composition, structure and metabolic  
21 functions of those communities. Microbial community structure can be partially assessed with  
22 universal PCR targeting taxonomic or functional gene markers. Increasingly, shotgun  
23 metagenomic DNA sequencing is providing more quantitative insight into microbiomes.  
24 Unfortunately both amplicon-based and shotgun sequencing approaches have significant  
25 shortcomings that limit the ability to study microbiome dynamics. We present a novel, amplicon-  
26 free, hybridization-based method (CaptureSeq) for profiling complex microbial communities  
27 using probes based on the chaperonin-60 gene. This new method generates a quantitative, pan-  
28 Domain community profile with significantly less expenditure and sequencing effort than a  
29 shotgun metagenomic sequencing approach. Molecular microbial profiles were compared for  
30 antibiotic-amended soil samples using CaptureSeq, shotgun metagenomics, and amplicon-based  
31 techniques. The CaptureSeq method generated a microbial profile that provided a much greater  
32 depth and sensitivity than shotgun metagenomic sequencing while simultaneously mitigating the  
33 bias effects associated with amplicon-based methods. The resulting community profile provided  
34 quantitatively reliable information about all three Domains of life (Bacteria, Archaea, and  
35 Eukarya). The applications of CaptureSeq are globally impactful and will facilitate highly  
36 accurate studies of host-microbiome interactions for environmental, crop, animal and human  
37 health.

## 38 INTRODUCTION

39 Life on Earth is classified into hierarchical taxonomic lineages that describe all living  
40 systems as having descended from a common ancestor along three evolutionary lines. Using  
41 ribosomal RNA-encoding gene sequences, Woese and Fox <sup>1</sup> delineated these Domains, which  
42 are now known as Bacteria, Archaea, and Eukarya <sup>2</sup>. Most complex microbial communities exist  
43 as assemblages replete with representatives from each of these Domains, the total genomic  
44 complement of which is called a microbiome. Understanding microbial community dynamics  
45 requires tools to examine the composition of these complex ecosystems. Advancements in DNA  
46 sequencing technology have created new opportunities to simplify the profiling of microbial  
47 communities from a diverse range of environments. As new insights are gained into the diversity  
48 of microbiomes in soil, water, plant and animal-associated ecosystems, we are collectively  
49 realizing the powerful effects that microbiome composition and structure can have on how these  
50 communities function <sup>3</sup>. To characterize the multifaceted relationships between microorganisms  
51 and their environment, it is critical to obtain a comprehensive microbial community profile that  
52 most accurately reflects its original composition and quantitative structure.

53 Microbiologists have increasingly embraced culture-independent methods of identification  
54 in recent decades <sup>4</sup>. By far the most commonly employed culture independent method is PCR-  
55 based amplification of informative gene sequences. In adapting the use of PCR for amplifying a  
56 conserved region of 16S rRNA, Weller and Ward provided the first example of microbial  
57 profiling <sup>5</sup>. More recently, Paul Hebert's proposed DNA barcoding criteria for Eukarya have  
58 established standards for what comprises a robust target for phylogenetic profiling <sup>6</sup>. Alternative  
59 universal gene markers for 16S <sup>7</sup>, *cpn60* <sup>8</sup>, *rpoB* <sup>9</sup>, *mcrA* <sup>10</sup> and ITS <sup>11</sup> have been used for  
60 profiling microorganisms from bacterial, archaeal and eukaryotic Domains, however no single

61 amplification is able to profile microbes from all three Domains simultaneously. In order to  
62 obtain phylogenetic information for microorganisms across all three Domains of life, separate  
63 target amplification and processing protocols are required<sup>12</sup>, increasing the cost and analytical  
64 complexity of accurately assessing dynamic changes in the community across Domains.  
65 Moreover, stochastic effects of primer interaction with a complex template, along with the  
66 difficulty in designing primers and amplification conditions that will equally target all members  
67 of a community<sup>13</sup>, result in an unavoidable bias in community representation both in terms of  
68 presence/absence and relative abundances<sup>13-16</sup>.

69 In recent years metagenomic approaches in which whole nucleic acid recovered from a  
70 sample is fragmented and sequenced using shotgun methods have become increasingly popular.  
71 This approach has a significant advantage over barcode-specific methods in that shotgun-  
72 sequencing data can overcome issues of bias and representation that are inherent in amplicon  
73 sequencing approaches, and provides the additional advantage of describing the metabolic  
74 potential of the microbial community<sup>17-19</sup>. Sequencing of all DNA present in an environmental  
75 sample can therefore be considered somewhat of a “gold standard” for taxonomic profiling.  
76 However, this approach is not without its own limitations. For example, it can be a wasteful  
77 enterprise in terms of the phylogenetic information recovered per sequencing cost. Shotgun  
78 sequencing is also not easily able to connect the functional potential observed in the sequencing  
79 data with the exact microbe within which that functionality resides. Additionally, DNA acquired  
80 from a community of microorganisms is inherently unbalanced; there are not equal numbers of  
81 each taxon, nor do all taxa have genomes that are of equal sizes. Thus shotgun sequencing can  
82 provide a view of microbial community composition that is biased by genome size and microbial  
83 abundances. Overcoming this bias requires significant amounts of sequencing; therefore, chasing

84 the rarity of the least abundant microbes by shotgun metagenomics sequencing carries a high  
85 financial cost<sup>14,15,20,21</sup>. The abundances of microbes within characterized complex microbial  
86 communities range over many orders of magnitude. While shotgun sequencing efforts provide a  
87 reasonable estimate of abundance there is a significant loss in dynamic range when compared to  
88 PCR-based profiling.

89 The chaperonin 60 gene<sup>8</sup> (type I chaperonin) and its Archaeal homologue thermosome  
90 complex<sup>22</sup> (type II chaperonin) have been previously recognized as highly discriminating targets  
91 across all three Domains of life<sup>23</sup>, meet standard International Barcode of Life criteria<sup>24</sup> and  
92 enable *de novo* assembly of operational taxonomic units (OTU)<sup>25</sup>. While “universal” PCR  
93 primers are available<sup>8,26</sup>, they are not expected to capture the pan-Domain diversity of a complex  
94 microbial community through amplification. Moreover, *cpn60* amplification provides OTU  
95 abundances that do not always correlate to the true abundance of the microorganism in the  
96 sample<sup>27</sup>. If these limitations can be overcome, there is significant opportunity to dramatically  
97 improve research assessing host-microbiome interactions in plant, human and animal settings.

98 Recent advances in hybridization-based DNA capture combined with high throughput  
99 sequencing (CaptureSeq), which have proven to be remarkably powerful means of enriching  
100 samples for DNA sequences of interest<sup>28-30</sup>, led us to consider the possibility of exploiting the  
101 unique features of *cpn60* to provide a pan-Domain microbial community profile without the use  
102 of universal PCR amplifications. A custom array of biotinylated RNA capture baits was designed  
103 based on the entire taxonomic composition of the chaperonin database cpnDB ([www.cpnDB.ca](http://www.cpnDB.ca))<sup>8</sup>  
104 and evaluated as a tool for enriching total genomic DNA simultaneously for type I and type II  
105 chaperonin target sequences. Samples were selected that encompassed taxonomic diversity  
106 across all three Domains of life. Soil samples comprised primarily of Bacteria, manure samples

107 with increased Archaeal diversity and a terrestrial pond sample with a larger number of Eukarya  
108 were used to compare the CaptureSeq method to standard shotgun metagenomic and amplicon-  
109 based approaches. The results indicate that CaptureSeq provides the taxonomic reach associated  
110 with shotgun metagenomic sequencing combined with the sampling depth of amplicon-based  
111 sequencing, giving an essentially complete, balanced, quantitatively accurate view of complex  
112 microbial ecosystems with reduced sequencing effort.

## 113 **RESULTS**

### 114 *CaptureSeq generates Pan-Domain microbial community profiles*

115 Microbial profiles were generated by CaptureSeq using samples from very different  
116 environmental ecosystems including soil, manure and a non-aerated terrestrial pond using  
117 CaptureSeq. These profiles provided a taxonomic overview of Bacteria, Archaea and Eukarya  
118 simultaneously, and identified sequencing reads from 9,361 (soil), 9,306 (manure), and 6,568  
119 (pond) distinct taxonomic clusters (Supplemental Dataset S1). Additionally, the CaptureSeq  
120 profile facilitated inter-Domain comparisons of read abundances between taxonomic groups,  
121 since the abundances could be expressed in relation to the total pan-Domain community as  
122 opposed to reflecting only the proportions within a single Domain (Figure 1).

123 The soil sample microbiomes were composed primarily of Bacteria, with Proteobacteria  
124 and Actinobacteria comprising 60% and 25% of the pan-Domain community respectively.  
125 Members of the phyla Acidobacteria and Gemmatimonadetes represented an additional 5%  
126 each of the microbiome. Total archaeal reads only accounted for 0.03-0.08% of the soil pan-  
127 Domain community, however there were still 165 archaeal taxonomic clusters identified in the  
128 soil. Eukarya represented 0.18-0.21% of the soil microbiome, with Fungi and Metazoa the most

129 abundant taxonomic groups. While the manure samples also contained a diverse array of  
130 Bacteria, they only represented 77-80% of the microbiome, compared to >99% for all of the soil  
131 samples. CaptureSeq libraries from the manure samples contained 19-22% archaeal reads, of  
132 which the vast majority were methanogens from the Phylum Euryarchaeota. The terrestrial pond  
133 contained a much greater proportion and diversity of Eukaryotes, representing 6.7% of the  
134 sequencing reads and 361 taxonomic clusters (Supplemental Dataset S1). *De novo* assembly of  
135 eukaryotic sequencing reads from the terrestrial pond sample generated 11 OTU most closely  
136 related to members of the Phylum Chlorophyta (green algae). Additionally, the assembly of OTU  
137 most similar to *Aenopholes* sp. (mosquitoes), and three members of the Phylum Alveolata  
138 (protists), suggests that CaptureSeq was able to retrieve *cpn60* DNA from higher level Eukarya.  
139 Compared to reference sequences in cpnDB, these *de novo* assembled OTU had nucleotide  
140 identities ranging from 59-84%, suggesting that the current probe array design and hybridization  
141 conditions were sufficiently permissive to allow capture of novel *cpn60* sequences (true  
142 unknowns).

143 ***CaptureSeq provides a similar microbial community profile to shotgun metagenomic***  
144 ***sequencing***

145 The complex taxonomic diversity found in soil provided an opportunity to determine if  
146 CaptureSeq yields a microbial community profile that accurately reflects the composition of the  
147 community and facilitates insights into the response of the communities to perturbation.  
148 Therefore, replicate plots amended with antibiotics were compared to control (unamended) soil  
149 samples using CaptureSeq, shotgun metagenomics, or *cpn60*-based amplicon sequencing  
150 techniques. In this setting, the ability of CaptureSeq to achieve in-depth sampling that is a more

151 accurate reflection of the community composition is critical to elucidate the effects of  
152 antimicrobial exposure on microbial ecosystem dynamics.

153 Both CaptureSeq and metagenomic techniques generated type I chaperonin sequences from  
154 all three Domains unencumbered by amplification and primer design biases. However, the  
155 number of chaperonin containing sequences represented only 0.08% of the total reads from the  
156 shotgun metagenomic library compared to an average of 16.7% ( $\pm 0.8\%$ ) for CaptureSeq and  
157 94.8% ( $\pm 0.6\%$ ) for amplicon libraries (Supplemental Table S1). For a complex community such  
158 as soil, a greater sampling depth is required in order to make meaningful conclusions regarding  
159 microbial community composition and structure. Using a metagenomic approach requires orders  
160 of magnitude more sequencing effort to achieve a high level of community coverage and is not  
161 financially feasible for a large number of samples (Figure 2).

162 Examination of OTU abundance patterns revealed that the CaptureSeq and shotgun  
163 metagenomic profiled samples displayed patterns of microbial abundances that were more  
164 similar to one another and distinct from the pattern shown by the amplicon datasets (Figure 3).  
165 Moreover, of the three methods analyzed, only CaptureSeq showed a hierarchical clustering  
166 pattern that showed a difference between the antibiotic-treated and untreated soil samples (Figure  
167 3). Similarly, when intra-technique beta diversity was assessed, only the CaptureSeq data  
168 provided measures that showed a separation of the soil samples by antibiotic treatment  
169 (Supplemental Figure S1). These results highlight the importance of profiling method on the  
170 ability to gain meaningful insights into microbiome structure and function.

171 Comparing alpha diversity metrics of the soil communities between the three profiling  
172 techniques suggested that both richness (Chao1) and diversity (Shannon H') were higher when



173 profiled using shotgun metagenomic compared to amplicon sequencing (Supplemental Figure  
174 S2). The CaptureSeq method provided alpha diversity metrics that were between those of the  
175 shotgun metagenomic shotgun method and amplicon sequencing (Supplemental Figure S2).  
176 Additionally, the alpha diversity metrics of the CaptureSeq method showed the least variability  
177 among the biological replicates of each treatment, even when libraries were down-sampled to  
178 very low levels (Supplemental Figure S2). Samples examined by *cpn60* amplification and  
179 sequencing displayed the highest inter-sample variability compared to CaptureSeq and  
180 metagenomic sequencing.

### 181 *CaptureSeq permits de novo assembly of OTU from taxonomic clusters*

182 To determine if *de novo* assembly of OTU representing individual organisms was reliable  
183 using CaptureSeq, we selected one target microorganism from each Domain for quantification  
184 using OTU-specific qPCR. For Bacteria, we quantified *Microbacterium* sp. C448, which was  
185 cultured from these soil samples and has previously been shown to degrade and metabolize the  
186 sulfonamide antibiotic added to the field plots<sup>31</sup>. While the presence of this target in the soil  
187 samples was confirmed using culture methods, it was under-represented in the amplicon and  
188 shotgun metagenomic libraries when compared to the CaptureSeq profiles. Only the CaptureSeq  
189 library provided a sufficient number of target sequencing reads for *de novo* assembly, generating  
190 a 1,066 bp OTU that was >99% identical to the *cpn60* sequence obtained from the genome of  
191 this organism<sup>32</sup>. We also assembled OTU targets from the Domains Eukarya (type I-  
192 *Phytophthora infestans*) and Archaea (type II-*Methanoculleus* sp.). Reads that mapped to the  
193 reference chaperonin sequences for these organisms were assembled *de novo* into OTU and were  
194 then quantified in each soil sample using ddPCR. Quantification of *Microbacterium* sp. C448  
195 showed that the bacterium was present at a low level in all soil samples of between 10<sup>3</sup> and 10<sup>4</sup>

196 gene copies per gram of soil, and that the levels were significantly higher in the antibiotic-treated  
197 soil samples (Table 1). The archaeal OTU was quantified at levels between 495 and 527 gene  
198 copies per gram of soil. The OTU corresponding to *P. infestans* was present at levels below the  
199 limit of detection of ddPCR for these samples, yet was detectable by CaptureSeq (Table 1).  
200 These results confirm the potential of the CaptureSeq method to almost completely sample  
201 complex microbial communities with a limit of detection beyond the dynamic range of even very  
202 sensitive quantification methods like ddPCR.

### 203 ***CaptureSeq provides a quantitatively accurate view of bacterial abundance***

204 Using a synthetic community of 20 microorganisms spiked into carrier DNA from a seed  
205 wash facilitated a quantitative examination microbial community profiles using CaptureSeq.  
206 Quantification of *cpn60* DNA from the synthetic community before and after hybridization using  
207 qPCR revealed an enrichment of 3-4 orders of magnitude for *cpn60*-containing DNA fragments  
208 compared to 16S rRNA-encoding genes (Supplemental Figure S3). For the 5 microorganisms  
209 that were quantified, the ~10-fold reduction in gene copy number observed between the high,  
210 medium, and low spike levels was consistent with the starting composition of the synthetic  
211 community samples (Supplemental Figure S3). Furthermore, the number of *cpn60* gene copies  
212 for the microorganisms added to the seed wash DNA extract was highly reproducible within each  
213 spike level across the 1000-fold difference analyzed (Supplemental Figure S3). Across the  
214 different spiking levels, there was a linear correlation between qPCR-determined input gene  
215 copies and the number of sequencing reads observed for each of the five targets using the  
216 CaptureSeq method, providing Pearson correlation coefficients ( $r^2$ ) ranging from 0.995-1.000.  
217 This compared to a range of 0.532-0.878 for libraries profiled by amplicon sequencing, with

218 more apparent distortion at the higher spike levels when targets were the most abundant (Figure  
219 4).

220 While all 20 bacteria from the synthetic community were identified using both amplicon  
221 and CaptureSeq profiling techniques, only the CaptureSeq method generated profiles that  
222 accurately reflected the relative amounts of DNA spiked into the seed wash background (Figure  
223 5 and Supplemental Table S2). In the CaptureSeq libraries, the number of mapped sequencing  
224 reads for each member of synthetic community was within one order of magnitude from the  
225 mean for each spike level. In the amplicon libraries however, the *cpn60* sequences of  
226 *Bifidobacterium infantis* and *Bifidobacterium bifidum*, which feature a high G/C content, were  
227 over 10- and 100-fold lower than the mean for both the High and Medium spiked samples  
228 (Supplemental Figure S4). This improved representation of high G/C Actinobacteria by  
229 CaptureSeq was also apparent in the microbial community profiles generated for the soil  
230 samples. Compared to the CaptureSeq libraries, the *cpn60* sequences of the 25 most under-  
231 represented taxonomic clusters in the amplicon libraries had very high G/C content (64-71%)  
232 and included several members of the genera *Nocardioides*, *Marmoricola* and *Pseudonocardia*  
233 (Supplemental Table S3).

234 *De novo* assembly of the mapped sequencing reads for each microorganism from the  
235 synthetic panel for both amplicon and CaptureSeq libraries generated OTU that were >99%  
236 identical to the known *cpn60* sequences.

## 237 **DISCUSSION**

238 Targeted capture of *cpn60* gene fragments resulted in an approximately 200-fold  
239 enrichment of the soil samples for the taxonomic marker of interest, from under 0.1% of reads in

240 the shotgun metagenomic sequencing to over 15% of reads in the CaptureSeq datasets. This level  
241 of enrichment enabled very deep sampling of the soil microbial communities (similar to that  
242 attained using PCR-based enrichment) with far less sequencing data (i.e. a significant cost  
243 savings). This is of particular importance when the organisms of interest are very low in  
244 abundance, such as *Microbacterium* sp. C448 in this study. OTU were observed in the  
245 CaptureSeq datasets that were present at extremely low levels in the soil genomic DNA, near or  
246 below the detection limit for ddPCR. Based on the assay setup and dilution factors we used, the  
247 theoretical ddPCR detection limit was 3570 copies/g soil, assuming detection of 10 copies per  
248 assay<sup>33</sup>. Although increased sequencing effort can result in more complete coverage of complex  
249 microbial communities using shotgun metagenomic sequencing<sup>15,21</sup>, application of this method to  
250 investigate the taxonomic composition of a sample is not an efficient use of budgetary resources.  
251 In addition, CaptureSeq provided a balanced view of the relative abundances of microorganisms  
252 within the community. PCR-associated representational bias, which presents a skewed  
253 representation of microbial taxon abundance<sup>34</sup>, is a well-known phenomenon<sup>35-37</sup>, and is likely  
254 the result of using end-point PCR product to generate the sequencing library as the exponential  
255 accumulation of amplicon serves to compress the dynamic range of relative DNA abundance in  
256 the end product of the reaction. CaptureSeq also resulted in an improvement of the representation  
257 of high G/C content microorganisms compared to amplification. Difficulty in amplification of  
258 high G/C content targets is a phenomenon that has been previously observed using both 16S and  
259 *cpn60* taxonomic markers from mixed communities<sup>26,38</sup>. *De novo* assembly of taxonomic  
260 clusters from the CaptureSeq datasets into OTU for which probes were not explicitly designed,  
261 such as *Microbacterium* sp. C448, also suggests that off-target *cpn60* sequence capture can  
262 expand the breadth of OTU observed in the dataset beyond the sequences represented in the

263 probe array and can include sequences that have not been previously observed. While  
264 CaptureSeq may be biased by the probe sequences employed, it is clearly capable of detecting  
265 novel microbes, expanding the breadth of microorganisms that are included in the microbial  
266 community profile beyond microbes that have been previously identified.

267 The overall patterns of OTU abundances in each of the three methods showed that the  
268 amplicon-based method provided a pattern that was distinct from the patterns observed for both  
269 CaptureSeq and shotgun metagenomic sequencing, which were more similar to one another.  
270 While the three methods all provided discernably different overall community profiles, the  
271 difference observed in the relative abundances of microorganisms was likely the result of  
272 different biases inherent in each of the methods. The over-representation in the amplicon datasets  
273 of several of the microorganisms that were very rare in the metagenomic and CaptureSeq  
274 libraries was likely the result of amplification effects on the relative abundances of  
275 microorganisms<sup>16,39</sup>. PCR amplification also introduced a higher experimental error in various  
276 alpha diversity parameters (Chao1, Shannon, Simpson) among the biological replicates analyzed  
277 compared to CaptureSeq and shotgun metagenomic sequencing. This observation is consistent  
278 with previous studies using 16S rRNA amplicon profiles of soil communities<sup>16,40</sup>. Among the  
279 three methods, CaptureSeq displayed the lowest inter-sample variation for these diversity  
280 parameters. CaptureSeq therefore has the potential to improve insight into microbial community  
281 dynamics by reducing experimental variability, and thereby improving reproducibility, compared  
282 to both amplicon-based and shotgun metagenomic sequencing. The consistency in alpha  
283 diversity calculations is likely a reflection of the reduced biases inherent in the CaptureSeq  
284 protocol and facilitates making meaningful conclusions about community richness and diversity.

285 The *cpn60* taxonomic marker enables *de novo* assembly of OTU<sup>23,25</sup> providing greater  
286 discrimination between closely related microorganisms and facilitating OTU-specific assay  
287 design. The *cpn60*-based CaptureSeq approach generates assembled chaperonin sequences that  
288 may also include regions flanking the sequence amplified by the universal primers, as observed  
289 with the OTU over 1 kb in length generated for *Microbacterium* sp. C448 and *Methanoculleus*  
290 *marisnigri* in this study. This additional sequencing information can provide further taxonomic  
291 discrimination of many prokaryotes, especially if the assembled region includes the *cpn10* co-  
292 chaperonin that is adjacent to *cpn60* in many bacterial genomes<sup>41</sup>. The OTU that were *de novo*  
293 assembled provided suitable targets for ddPCR, facilitating the enumeration of targeted  
294 microorganisms from each Domain, which had initially been identified by sequencing and  
295 assembly. Such an approach can be used to identify biological interactions between/among  
296 microorganisms that can explain their relative abundance patterns<sup>23</sup>.

297 Both CaptureSeq and shotgun metagenomic sequencing provided the means to identify  
298 OTU from all Domains simultaneously, facilitating the characterization of inter-Domain  
299 relationships among microorganisms. The ability to calculate the abundances of organisms as a  
300 proportion of the entire pan-Domain community facilitates the identification of inter-Domain  
301 relationships and syntrophies. This is of particular importance in many settings (e.g. manure or  
302 gut health) in identifying the syntrophic relationships between volatile fatty acid producing  
303 Bacteria and methanogenic Archaea<sup>42</sup>. In soil, the complex relationship between saprophytic  
304 Fungi and Bacteria is critical to examining the role of the microbiome in nutrient cycling<sup>43</sup>.  
305 Similarly in the terrestrial pond, the bacterial and eukaryotic components of the microbial  
306 ecosystems can be directly compared numerically, which may allow insights into inter-Domain  
307 relationships that impact elemental cycles or other ecosystem services. This advantage is not

308 offered using amplification of universal targets, although it does provide the benefit of very deep  
309 coverage of complex microbial communities. Shotgun metagenomic genome sequencing does  
310 not provide the community coverage of either the amplicon-based or CaptureSeq methods at a  
311 similar sequencing effort, suggesting that complex microbiomes will likely require additional  
312 phylogenetic data to make any informed examination of microbial diversity metrics. CaptureSeq  
313 enabled deep coverage of complex microbial communities, although the community  
314 representation is naturally biased by the hybridization probes used. However, we observed off-  
315 target hybridization, as evidenced by the appearance of *cpn60* OTU in the CaptureSeq datasets.  
316 Optimizing the hybridization parameters may result in further improvements to the enrichment of  
317 taxonomic markers in complex templates, increasing the efficiency of this approach to microbial  
318 community profiling. Shotgun metagenomics can reasonably be considered the least biased  
319 means of determining the taxonomic composition of an environmental sample, and may be a  
320 suitable choice when sufficient sequencing resources are available. However the abiding  
321 popularity of amplicon-based profiling is at least partially a result of the high degree of  
322 enrichment of taxonomically informative sequence reads that it generates. CaptureSeq provides  
323 an alternative that avoids the amplification biases associated with PCR while retaining the  
324 sequencing efficiency of amplicon-based profiling.

325       Molecular microbial community profiling is one of the foundational steps in exploring  
326 microbiome structure-function relationships in an experimental system<sup>44-46</sup>. To generate and  
327 evaluate scientific hypotheses it is critical to generate a microbiome profile that reflects the  
328 natural state as closely as possible with sufficient sensitivity to evaluate both abundant and rare  
329 microorganisms. The *cpn60*-based method described herein permits taxonomically broad and  
330 deep microbial community profiling of complex microbiomes. Thus CaptureSeq has the potential

331 to impact life sciences research wherever microbes are thought to be important, including human  
332 health and nutrition<sup>47</sup>, agriculture<sup>48</sup>, biotechnology<sup>49</sup>, and environmental sciences<sup>50</sup>. Several  
333 methodologies are available for microbial community profiling, including 16S and ITS  
334 amplification and sequencing, as well as profiling using 16S rRNA-based capture probes<sup>30</sup>.  
335 While all microbial community profiling techniques have inherent limitations and biases,  
336 compared to shotgun metagenomic and universal target amplification, CaptureSeq is a suitable  
337 alternative that provides quantitative, pan-Domain analysis of complex communities.

## 338 **MATERIALS AND METHODS**

### 339 *Soil sample preparation*

340 Soil samples were obtained from a long-term study initiated in 1999 evaluating the effect  
341 of annual antibiotic exposure on soil microbial communities, described in Cleary *et al.*<sup>51</sup>. Soil  
342 samples evaluated in the present study were obtained in 2013 following 15 sequential annual  
343 applications of a mixture of sulfamethazine, chlortetracycline and tylosin, each added at 10 mg  
344 kg<sup>-1</sup> soil. Soil was sampled 30 days after the spring application of antibiotics. The plots were  
345 planted with soybeans (*Glycine max*, v. Harosoy) immediately after incorporation of the  
346 antibiotics. One triplicate group of plots had experienced no antibiotic treatment, and the other  
347 triplicate set had received yearly antibiotic treatments since 1999 as described<sup>51</sup>. Genomic DNA  
348 was extracted from 3.5 g of each soil sample using the PowerMax Soil DNA isolation kit (Mo-  
349 Bio Laboratories, Carlsbad, CA) with a 5 mL elution volume. DNA extracts were quantified  
350 using a Qubit fluorimeter (Thermo Fisher Scientific, Waltham, MA, USA) and stored at -80°C  
351 until processing and analysis.

### 352 *Terrestrial pond sample preparation*



353 A water sample was obtained from a pond located on a Saskatchewan farm (51.99°N, -  
354 106.46°W) on May 13, 2016. Biological material was recovered from 2L of water by  
355 centrifugation at 20,000 g for 20 minutes. Total DNA was extracted using a PowerWater DNA  
356 extraction kit (Mo-Bio Laboratories, Carlsbad, CA) and quantified as described above.

#### 357 ***Seed wash carrier DNA preparation***

358 Genomic DNA to act as carrier DNA for spiking 10-fold decreasing amounts of a  
359 synthetic community was generated by washing wheat seeds as previously described<sup>23</sup>, and  
360 known to lack all of the microorganisms comprising the synthetic community panel<sup>23</sup>.

#### 361 ***Synthetic community sample preparation***

362 Amplicons corresponding to the *cpn60* UT of 20 bacteria associated with the human  
363 vaginal tract<sup>25</sup> were cloned into the pGEM-T Easy plasmid (Promega, WI, USA) and purified  
364 using the Qiagen Miniprep kit (Qiagen, CA, USA). The synthetic community was formed by  
365 combining equimolar concentrations of plasmids containing the *cpn60* UT for all 20  
366 microorganisms<sup>25</sup>. Dilutions of this mixture (corresponding to 0.4, 0.04, and 0.004 ng plasmid  
367 DNA, or approximately 10<sup>8</sup>, 10<sup>7</sup>, and 10<sup>6</sup> copies of each plasmid) were spiked into a background  
368 of 10 ng/μl of wheat seed carrier DNA. Spiked genomic DNA samples prepared in this way were  
369 sequenced using *cpn60* universal target amplification and CaptureSeq as described below.

370 The efficacy of the CaptureSeq hybridization was assessed prior to sequencing using  
371 quantitative PCR (qPCR) targeting plasmids added to the seed wash background. qPCR primers  
372 and amplification conditions were as described previously<sup>52</sup>. Total bacteria were enumerated  
373 using qPCR targeting the 16S ribosomal RNA-encoding gene as described previously<sup>53</sup>.

374 ***Amplicon-based sequencing***

375           The *cpn60* UT was amplified from synthetic community-spiked DNA or soil genomic  
376 DNA samples using 40 cycles of PCR with the type I chaperonin universal primer cocktail  
377 containing a 1:3 ratio of H279/H280:H1612/H1613<sup>26</sup> and cycling conditions of 1x 95°C, 5 min;  
378 40x 95°C 30sec, 42-60°C 30sec, 72°C 30sec; 1x 72°C 2min. Replicate reactions from each  
379 amplification temperature for each sample were pooled and gel purified using the Blue Pippin  
380 Prep system (Sage Science, MA, USA) with a 2% agarose cassette, and concentrated using  
381 Amicon 30K 0.5 ml spin columns (EMD Millipore, MA, USA). Amplicon from all samples was  
382 prepared for sequencing using the NEBNext Illumina library preparation kit (New England  
383 Biolabs, location), and sequenced with 400 forward cycles of v2 Miseq chemistry.

384 ***CaptureSeq array design***

385           Capture probes were designed based on all type I and type II chaperone sequences in the  
386 public domain (i.e. CpnDB; [www.cpnadb.ca](http://www.cpnadb.ca))<sup>8</sup>. 15,733 probes were designed to be complementary  
387 to the type I and type II chaperone sequences. Design of probes was based on identifying 120bp  
388 sequences from the reference database using a 60bp incrementing step. Thus the resulting probes  
389 should share a 50% overlap with the next probe in a tiling-like fashion. The custom oligos were  
390 bound to magnetic beads in equimolar concentration as a custom Mybaits array by Mycoarray  
391 (Ann Arbor, MI, USA).

392 ***Shotgun metagenomic sequencing and CaptureSeq preparation***

393           Genomic DNA from each of the soil samples was diluted to 2.5 ng/μl and split into two  
394 aliquots of 100 μl each for shearing using a water bath sonicator as described<sup>54</sup>. Shotgun  
395 metagenomic genomic sequencing libraries were prepared directly from one aliquot of each

396 sheared genomic DNA sample using the NEBNext Illumina library preparation kit according to  
397 the manufacturer's directions (New England Biolabs, MA, USA). Samples were then sequenced  
398 with 2x250 bp cycles of v2 Miseq chemistry (Illumina, CA, USA).

399 To generate the CaptureSeq libraries, the second aliquots of sheared genomic DNA  
400 samples were subjected to end repair and index addition using NEBNext as above, then  
401 hybridized to the capture probe array as described<sup>54</sup>. The chaperonin-enriched products were  
402 then sequenced with 2x250 bp cycles of v2 Miseq chemistry (Illumina, CA, USA).

### 403 ***Sequencing analysis***

404 To compare the number of output sequencing reads for the different spiking levels,  
405 sequencing reads from the synthetic community-spiked samples were down-sampled to the  
406 smallest library size for each profiling technique (30,091 for amplicon and 506,247 for  
407 CaptureSeq) and mapped to a reference set of *cpn60* UT sequences for the 20 microorganisms in  
408 the panel by local paired alignment using bowtie2 (v. 2.2.3)<sup>55</sup>.

409 A reference database of all publically available chaperonin sequences was generated by  
410 selecting a list of seven chaperonin protein sequences representing each taxonomic group: fungi,  
411 bacteria, archaea, plant mitochondria, plant chloroplast, and animal mitochondria. These probes  
412 were used as queries for a BLAST search of GenBank using the default parameters to blastp.  
413 Matching protein sequences were manually vetted to generate a list of 30,141 protein identifiers.  
414 These protein identifiers were then used to retrieve the corresponding 30,120 nucleotide  
415 sequences available in GenBank according to the procedure described in Supplemental  
416 Information. The accession numbers of those nucleotide sequences are provided in Supplemental  
417 Dataset S2. The breadth of taxa that were retrieved by this method was similar to the taxonomic

418 breadth represented in the 16S and ITS reference datasets (Supplemental Dataset S3).  
419 Sequencing reads from all soil samples were grouped into taxonomic clusters by paired local  
420 alignment to this reference set of chaperonin genes using bowtie2. The sequencing libraries were  
421 down-sampled to the size of the smallest shotgun metagenomic library (2,777 mapped paired  
422 reads), and the relative abundances of each of the resulting taxonomic clusters was used as the  
423 basis for assessing the alpha and beta diversity metrics of the three profiling methods for  
424 equivalent sampling effort.

#### 425 ***De novo OTU assembly and quantification***

426 Read pairs from target taxonomic clusters were assembled *de novo* into *cpn60* OTU using  
427 Trinity (v. 2.4.0) with a kmer of 31. OTU-specific primer and hydrolysis probe sets were  
428 designed using Primer3<sup>56</sup> or Beacon Designer (v.7) (Premier Biosoft, Palo Alto, CA, USA) as  
429 described previously<sup>57</sup>. Annealing temperatures were optimized for each reaction using gradient  
430 PCR with ddPCR Supermix for Probes (Bio-Rad, Mississauga, ON, Canada) using 900 nM each  
431 primer and 250 nM of hydrolysis probe in a 20  $\mu$ l reaction volume. Primer/probe sequences and  
432 optimized amplification conditions are shown in Supplemental Table S1. Template DNA was  
433 digested prior to amplification using *EcoRI* at 37°C for 60 minutes. A final volume of 2-5  $\mu$ l was  
434 used as template for droplet digital PCR (ddPCR). Emulsions were formed using a QX100  
435 droplet generator (Bio-Rad, Hercules, CA, USA), and amplifications were carried out using a  
436 C1000 Touch thermocycler (Bio-Rad). Reactions were analyzed using a QX100 droplet reader  
437 (Bio-Rad) and quantified using QuantaSoft (v.1.6.6) (Bio-Rad). Results were converted to copy  
438 number/g soil extracted by accounting for sample preparation and dilution. For the prepared  
439 CaptureSeq libraries, results were converted to copy number/ $\mu$ l by considering dilution factors.

#### 440 ***Alpha diversity analysis***

441 To compare the richness and diversity metrics between the three profiling techniques,  
442 mapped sequencing reads were down-sampled from 250-2,750 reads to simulate a uniform  
443 sampling effort across profiling techniques. Metrics were averaged across 100 bootstrapped  
444 datasets using the `multiple_rarefactions.py` and `alpha_diversity.py` scripts from QIIME (v. 1.8.0)  
445 <sup>58</sup>.

446 In the cases where the total effect of sequencing effort was required for comparisons across  
447 estimates of community coverage read thresholds were transformed to reflect total sequencing  
448 effort for each sample.

#### 449 *Beta diversity analysis*

450 To compare the community similarity between different sequencing methods, mapped  
451 sequencing reads were down-sampled to the size of the smallest metagenomic library sample  
452 (2,777 mapped reads). For intra-technique comparisons, mapped sequencing reads were down-  
453 sampled to the smallest library size within each profiling method; 2,777 for metagenomic,  
454 127,642 for CaptureSeq, and 27,388 reads for amplicon libraries. Principal Coordinate Analysis  
455 of inter- and intra-technique Bray-Curtis distance was calculated using the `vegan` package (v.  
456 2.4.2) in R (v. 3.2.4).

457

458 **REFERENCES**

- 459 1 Woese, C. R. & Fox, G. E. Phylogenetic structure of the prokaryotic domain: The primary  
460 kingdoms. *Proc. Natl. Acad. Sci. U.S.A.* **74**, 5088-5090, doi:10.1073/pnas.74.11.5088 (1977).
- 461 2 Woese, C. R., Kandler, O. & Wheelis, M. L. Towards a natural system of organisms: proposal for  
462 the domains Archaea, Bacteria, and Eucarya. *Proc. Natl. Acad. Sci. U.S.A.* **87**, 4576-4579,  
463 doi:10.1073/pnas.87.12.4576 (1990).
- 464 3 Tikhonovich, I. A. & Provorov, N. A. Microbiology is the basis of sustainable agriculture: An  
465 opinion. *Ann. Appl. Biol.* **159**, 155-168, doi:10.1111/j.1744-7348.2011.00489.x (2011).
- 466 4 J T Staley, a. & Konopka, A. Measurement of *in situ* activities of nonphotosynthetic  
467 microorganisms in aquatic and terrestrial habitats. *Annu Rev Microbiol* **39**, 321-346,  
468 doi:10.1146/annurev.mi.39.100185.001541 (1985).
- 469 5 Weller, R. & Ward, D. M. Selective recovery of 16S rRNA sequences from natural microbial  
470 communities in the form of cDNA. *Appl. Environ. Microbiol.* **55**, 1818-1822 (1989).
- 471 6 Hebert, P. D. N., Cywinska, A., Ball, S. L. & deWaard, J. R. Biological identifications through DNA  
472 barcodes. *Proc R Soc Lond [Biol]* **270**, 313-321, doi:10.1098/rspb.2002.2218 (2003).
- 473 7 Singer, E. *et al.* High-resolution phylogenetic microbial community profiling. *ISME J* **10**, 2020-  
474 2032, doi:10.1038/ismej.2015.249 (2016).
- 475 8 Hill, J. E., Penny, S. L., Crowell, K. G., Goh, S. H. & Hemmingsen, S. M. cpnDB: A chaperonin  
476 sequence database. *Genome Res.* **14**, 1669-1675 (2004).
- 477 9 Adékambi, T., Drancourt, M. & Raoult, D. The *rpoB* gene as a tool for clinical microbiologists.  
478 *Trends Microbiol.* **17**, 37-45 (2009).
- 479 10 Barret, M. *et al.* Identification of *Methanoculleus* spp. as active methanogens during anoxic  
480 incubations of swine manure storage tank samples. *Appl. Environ. Microbiol.* **79**, 424-433 (2013).
- 481 11 Schoch, C. L. *et al.* Nuclear ribosomal internal transcribed spacer (ITS) region as a universal DNA  
482 barcode marker for Fungi. *Proc. Natl. Acad. Sci. U.S.A.* **109**, 6241-6246,  
483 doi:10.1073/pnas.1117018109 (2012).
- 484 12 Barret, M. *et al.* Emergence shapes the structure of the seed-microbiota. *Appl. Environ.*  
485 *Microbiol.* **81**, 1257-1266 (2015).
- 486 13 Walker, A. W. *et al.* 16S rRNA gene-based profiling of the human infant gut microbiota is  
487 strongly influenced by sample processing and PCR primer choice. *Microbiome* **3**, 26,  
488 doi:10.1186/s40168-015-0087-4 (2015).
- 489 14 Guo, J., Cole, J. R., Zhang, Q., Brown, C. T. & Tiedje, J. M. Microbial community analysis with  
490 ribosomal gene fragments from shotgun metagenomes. *Appl. Environ. Microbiol.* **82**, 157-166,  
491 doi:10.1128/aem.02772-15 (2016).
- 492 15 Lynch, M. D. J. & Neufeld, J. D. Ecology and exploration of the rare biosphere. *Nat Rev Micro* **13**,  
493 217-229, doi:10.1038/nrmicro3400 (2015).
- 494 16 Poretzky, R., Rodriguez-R, L. M., Luo, C., Tsementzi, D. & Konstantinidis, K. T. Strengths and  
495 limitations of 16S rRNA gene amplicon sequencing in revealing temporal microbial community  
496 dynamics. *PLOS ONE* **9**, e93827, doi:10.1371/journal.pone.0093827 (2014).
- 497 17 Hess, M. *et al.* Metagenomic discovery of biomass-degrading genes and genomes from cow  
498 rumen. *Science* **331**, 463-467 (2011).
- 499 18 Raymond, F. *et al.* The initial state of the human gut microbiome determines its reshaping by  
500 antibiotics. *ISME J* **10**, 707-720, doi:10.1038/ismej.2015.148 (2016).
- 501 19 Handley, K. M. *et al.* Biostimulation induces syntrophic interactions that impact C, S and N  
502 cycling in a sediment microbial community. *ISME J.* **7**, 800-816, doi:10.1038/ismej.2012.148  
503 (2013).

- 504 20 Fierer, N. *et al.* Cross-biome metagenomic analyses of soil microbial communities and their  
505 functional attributes. *Proc. Natl. Acad. Sci. U.S.A.* **109**, 21390-21395,  
506 doi:10.1073/pnas.1215210110 (2012).
- 507 21 Luo, C. *et al.* Soil microbial community responses to a decade of warming as revealed by  
508 comparative metagenomics. *Appl. Environ. Microbiol.* **80**, 1777-1786, doi:10.1128/aem.03712-  
509 13 (2014).
- 510 22 Chaban, B. & Hill, J. E. A 'universal' type II chaperonin PCR detection system for the investigation  
511 of Archaea in complex microbial communities. *ISME J.* **6**, 430-439 (2012).
- 512 23 Links, M. G. *et al.* Simultaneous profiling of seed-associated bacteria and fungi reveals  
513 antagonistic interactions between microorganisms within a shared epiphytic microbiome on  
514 *Triticum* and *Brassica* seeds. *New Phytol.* **202**, 542-553, doi:10.1111/nph.12693 (2014).
- 515 24 Links, M. G., Dumonceaux, T. J., Hemmingsen, S. M. & Hill, J. E. The chaperonin-60 universal  
516 target is a barcode for bacteria that enables *de novo* assembly of metagenomic sequence data.  
517 *PLoS One* **7**, e49755, doi:10.1371/journal.pone.0049755 (2012).
- 518 25 Links, M. G., Chaban, B., Hemmingsen, S., Muirhead, K. & Hill, J. mPUMA: a computational  
519 approach to microbiota analysis by de novo assembly of operational taxonomic units based on  
520 protein-coding barcode sequences. *Microbiome* **1**, 23 (2013).
- 521 26 Hill, J. E., Town, J. R. & Hemmingsen, S. M. Improved template representation in *cpn60*  
522 polymerase chain reaction (PCR) product libraries generated from complex templates by  
523 application of a specific mixture of PCR primers. *Environ. Microbiol.* **8**, 741-746,  
524 doi:10.1111/j.1462-2920.2005.00944.x (2006).
- 525 27 Dumonceaux, T. J., Hill, J. E., Hemmingsen, S. M. & Van Kessel, A. G. Characterization of  
526 intestinal microbiota and response to dietary virginiamycin supplementation in the broiler  
527 chicken. *Appl. Environ. Microbiol.* **72**, 2815-2823 (2006).
- 528 28 Schuenemann, V. J. *et al.* Targeted enrichment of ancient pathogens yielding the pPCP1 plasmid  
529 of *Yersinia pestis* from victims of the Black Death. *Proc. Natl. Acad. Sci. U.S.A.* **108**, E746-E752,  
530 doi:10.1073/pnas.1105107108 (2011).
- 531 29 Wagner, D. M. *et al.* *Yersinia pestis* and the Plague of Justinian 541-543 AD: a genomic analysis.  
532 *Lancet Infect Dis* (2014).
- 533 30 Gasc, C. & Peyret, P. Hybridization capture reveals microbial diversity missed using current  
534 profiling methods. *Microbiome* **6**, 61, doi:10.1186/s40168-018-0442-3 (2018).
- 535 31 Topp, E. *et al.* Accelerated biodegradation of veterinary antibiotics in agricultural soil following  
536 long-term exposure, and isolation of a sulfamethazine-degrading *Microbacterium* sp. *J. Environ.*  
537 *Qual.* **42**, 173-178, doi:10.2134/jeq2012.0162 (2013).
- 538 32 Martin-Laurent, F., Marti, R., Waglechner, N., Wright, G. D. & Topp, E. Draft Genome Sequence  
539 of the Sulfonamide Antibiotic-Degrading *Microbacterium* sp. Strain C448. *Genome*  
540 *Announcements* **2**, e01113-01113, doi:10.1128/genomeA.01113-13 (2014).
- 541 33 Bustin, S. A. *et al.* The MIQE guidelines: minimum information for publication of quantitative  
542 real-time PCR experiments. *Clin Chem* **55**, 611-622 (2009).
- 543 34 Props, R. *et al.* Absolute quantification of microbial taxon abundances. *ISME J.*  
544 doi:10.1038/ismej.2016.117 (2016).
- 545 35 Johnson, L. A., Chaban, B., Harding, J. C. & Hill, J. E. Optimizing a PCR protocol for *cpn60*-based  
546 microbiome profiling of samples variously contaminated with host genomic DNA. *BMC research*  
547 *notes* **8**, 253, doi:10.1186/s13104-015-1170-4 (2015).
- 548 36 Green, S. J., Venkatramanan, R. & Naqib, A. Deconstructing the polymerase chain reaction:  
549 Understanding and correcting bias associated with primer degeneracies and primer-template  
550 mismatches. *PLoS ONE* **10**, doi:10.1371/journal.pone.0128122 (2015).

- 551 37 Lee, C. K. *et al.* Groundtruthing next-gen sequencing for microbial ecology-biases and errors in  
552 community structure estimates from PCR amplicon pyrosequencing. *PLoS ONE* **7**,  
553 doi:10.1371/journal.pone.0044224 (2012).
- 554 38 Pinto, A. J. & Raskin, L. PCR biases distort bacterial and archaeal community structure in  
555 pyrosequencing datasets. *PLOS ONE* **7**, e43093, doi:10.1371/journal.pone.0043093 (2012).
- 556 39 Logares, R. *et al.* Metagenomic 16S rDNA Illumina tags are a powerful alternative to amplicon  
557 sequencing to explore diversity and structure of microbial communities. *Environ. Microbiol.* **16**,  
558 2659-2671, doi:10.1111/1462-2920.12250 (2014).
- 559 40 Ranjan, R., Rani, A., Metwally, A., McGee, H. S. & Perkins, D. L. Analysis of the microbiome:  
560 Advantages of whole genome shotgun versus 16S amplicon sequencing. *Biochem. Biophys. Res.*  
561 *Commun.* **469**, 967-977, doi:<http://dx.doi.org/10.1016/j.bbrc.2015.12.083> (2016).
- 562 41 Chaban, B., Links, M. & Hill, J. A molecular enrichment strategy based on *cpn60* for detection of  
563 Epsilon-Proteobacteria in the dog fecal microbiome. *Microb. Ecol.* **63**, 348-357,  
564 doi:10.1007/s00248-011-9931-7 (2012).
- 565 42 Demirel, B. & Scherer, P. The roles of acetotrophic and hydrogenotrophic methanogens during  
566 anaerobic conversion of biomass to methane: a review. *Rev. Environ. Sci. Biotechnol.* **7**, 173-190  
567 (2008).
- 568 43 de Menezes, A. B., Richardson, A. E. & Thrall, P. H. Linking fungal-bacterial co-occurrences to  
569 soil ecosystem function. *Curr. Opin. Microbiol.* **37**, 135-141,  
570 doi:<http://dx.doi.org/10.1016/j.mib.2017.06.006> (2017).
- 571 44 Carballa, M., Regueiro, L. & Lema, J. M. Microbial management of anaerobic digestion:  
572 exploiting the microbiome-functionality nexus. *Curr. Opin. Biotechnol.* **33**, 103-111,  
573 doi:<http://dx.doi.org/10.1016/j.copbio.2015.01.008> (2015).
- 574 45 Gopal, M. & Gupta, A. Microbiome selection could spur next-generation plant breeding  
575 strategies. *Frontiers in microbiology* **7**, doi:10.3389/fmicb.2016.01971 (2016).
- 576 46 Muegge, B. D. *et al.* Diet drives convergence in gut microbiome functions across mammalian  
577 phylogeny and within humans. *Science* **332**, 970-974, doi:10.1126/science.1198719 (2011).
- 578 47 Kau, A. L., Ahern, P. P., Griffin, N. W., Goodman, A. L. & Gordon, J. I. Human nutrition, the gut  
579 microbiome and the immune system. *Nature* **474**, 327-336, doi:10.1038/nature10213 (2011).
- 580 48 Busby, P. E. *et al.* Research priorities for harnessing plant microbiomes in sustainable  
581 agriculture. *PLOS Biology* **15**, e2001793, doi:10.1371/journal.pbio.2001793 (2017).
- 582 49 Koch, C., Müller, S., Harms, H. & Harnisch, F. Microbiomes in bioenergy production: From  
583 analysis to management. *Curr. Opin. Biotechnol.* **27**, 65-72, doi:10.1016/j.copbio.2013.11.006  
584 (2014).
- 585 50 Fierer, N. Embracing the unknown: disentangling the complexities of the soil microbiome.  
586 *Nature reviews. Microbiology* (2017).
- 587 51 Cleary, D. W. *et al.* Long-term antibiotic exposure in soil is associated with changes in microbial  
588 community structure and prevalence of class 1 integrons. *FEMS Microbiol Ecol* **92**,  
589 doi:10.1093/femsec/fiw159 (2016).
- 590 52 Dumonceaux, T. J. *et al.* Multiplex detection of bacteria associated with normal microbiota and  
591 with bacterial vaginosis in vaginal swabs by use of oligonucleotide-coupled fluorescent  
592 microspheres. *J Clin Microbiol* **47**, 4067-4077, doi:10.1128/jcm.00112-09 (2009).
- 593 53 Lee, D. H., Zo, Y. G. & Kim, S. J. Nonradioactive method to study genetic profiles of natural  
594 bacterial communities by PCR-single-strand-conformation polymorphism. *Appl. Environ.*  
595 *Microbiol.* **62**, 3112-3120 (1996).
- 596 54 Dumonceaux, T. J., Links, M. G., Town, J. R., Hill, J. E. & Hemmingsen, S. M. Targeted capture of  
597 *cpn60* gene fragments for PCR-independent microbial community profiling. *Protoc exch* (2017).



- 598 55 Langmead, B., Trapnell, C., Pop, M. & Salzberg, S. L. Ultrafast and memory-efficient alignment of  
599 short DNA sequences to the human genome. *Genome Biol* **10**, R25 (2009).  
600 56 Rozen, S. & Skaletsky, H. Primer3 on the WWW for general users and for biologist programmers.  
601 *Methods in molecular biology (Clifton, N.J.)* **132**, 365-386 (2000).  
602 57 Pérez-López, E., Hammond, C., Olivier, C. Y. & Dumonceaux, T. J. in *Diagnostic Bacteriology* Vol.  
603 1616 *Methods in Molecular Biology* (ed K.A. Bishop-Lilly) (Humana Press, 2017).  
604 58 Caporaso, J. G. *et al.* QIIME allows analysis of high-throughput community sequencing data.  
605 *Nature Meth.* **7**, 335-336 (2010).

## 606 **Authors' contributions**

607 ET, SH, TD and AC performed collection, processing and sequencing of all samples. ML, LM  
608 and JT performed bioinformatics analysis of sequencing data. All authors contributed to writing  
609 the manuscript.

## 610 **Acknowledgements**

611 This work was funded through Agriculture and Agri-Food Canada A-base project 1562:  
612 Optimizing soil health and protecting environmental quality through judicious manure  
613 management, and innovative cover cropping.

## 614 **Competing interests**

615 The author(s) declare no competing financial or non-financial interests.

616

617 **Figure Legends:**

618 **Figure 1:** CaptureSeq was used to simultaneously profile Bacteria, Archaea, and Eukarya from  
619 an ecologically diverse range of samples including soil (n=6), manure (n=3), and a freshwater  
620 pond (n=1). The relative abundances of individual Phyla were expressed as a proportion of the  
621 entire pan-Domain microbial community.

622 **Figure 2:** Good's coverage estimate reflecting the average total sequencing effort for six soil  
623 samples each profiled using amplicon (red), CaptureSeq (blue), or shotgun metagenomic (green)  
624 approaches.

625 **Figure 3:** Proportional abundance of taxonomic clusters for type I chaperonins in soil samples  
626 profiled using amplicon, CaptureSeq, or shotgun metagenomic approaches. Samples were  
627 clustered based on Bray-Curtis distance, and reference clusters composing a minimum of 0.5%  
628 of the mapped sequencing reads in any one sample are shown.

629 **Figure 4:** The correlation between input *cpn60* gene copies quantified by species-specific  
630 quantitative PCR and the number of mapped sequencing reads was determined for 5 bacteria  
631 from the synthetic community.

632 **Figure 5:** Sequencing read abundance for seed wash samples spiked with a synthetic community  
633 of 20 bacteria in 10-fold decreasing dilutions and were profiled using UT amplification or  
634 CaptureSeq profiling methods. The color scale represents the  $\log_{10}$  read abundance in the  
635 sequencing library.

636

637 **Tables:**

638 **Table 1:** Abundances of selected OTU from each Domain, as determined by quantitative PCR.

| OTU                         | Domain                           | cpnDB nearest neighbor           | OTU Length (bp) | Sequence identity (%) <sup>a</sup> | Treatment (mg kg <sup>-1</sup> ) | soil extract (copies/g soil) | Post-hybridization sample (copies/ $\mu$ l) |
|-----------------------------|----------------------------------|----------------------------------|-----------------|------------------------------------|----------------------------------|------------------------------|---------------------------------------------|
| XP002901426<br>DN2_c0_g1_i1 | Eukarya<br>(type I) <sup>b</sup> | <i>Phytophthora infestans</i>    | 539             | 100                                | 0<br>10                          | ND <sup>c</sup><br>ND        | 1242<br>3942                                |
| WP036300323<br>DN4_c3_g1_i2 | Bacteria<br>(type I)             | <i>Microbacterium</i> sp. C448   | 1,066           | 99                                 | 0<br>10                          | 6750<br>38571 <sup>d</sup>   | 1417<br>8170 <sup>d</sup>                   |
| KUL05486<br>DN0_c0_g1_i1    | Archaea<br>(type II)             | <i>Methanoculleus marisnigri</i> | 1,029           | 92                                 | 0<br>10                          | 495<br>527                   | ND<br>3360                                  |

<sup>a</sup>Percent identity to reference sequence in cpnDB.

<sup>b</sup>Type I refers to the ~60 kDa mitochondrial and chloroplast proteins found in Bacteria, Eukarya, and certain Archaea. Type II refers to TCP1, the cytoplasmic orthologue of the group I chaperonins found in Archaea.

<sup>c</sup>ND, not detected. The theoretical detection limit was 3570 copies/g soil, as discussed in the text.

<sup>d</sup>Statistically significant difference ( $p < 0.01$ ) between 0 mg kg<sup>-1</sup> and 10 mg kg<sup>-1</sup> groups, using a Mann-Whitney rank sum test

639

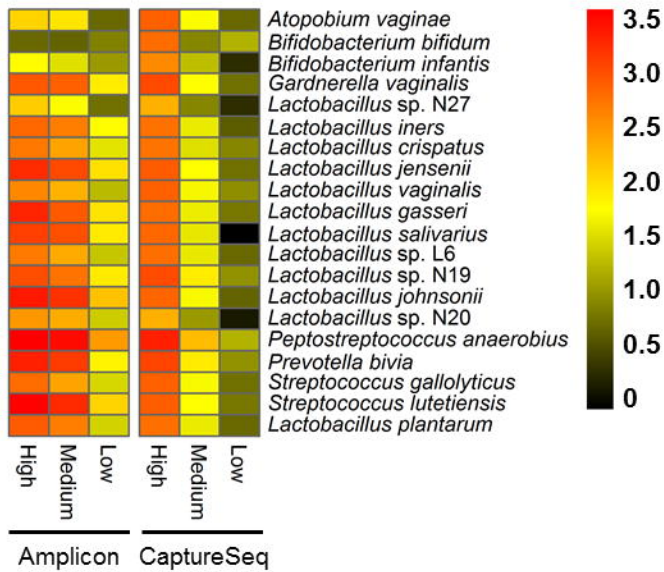

● Manure ● Pond ● Soil

### Bacteria

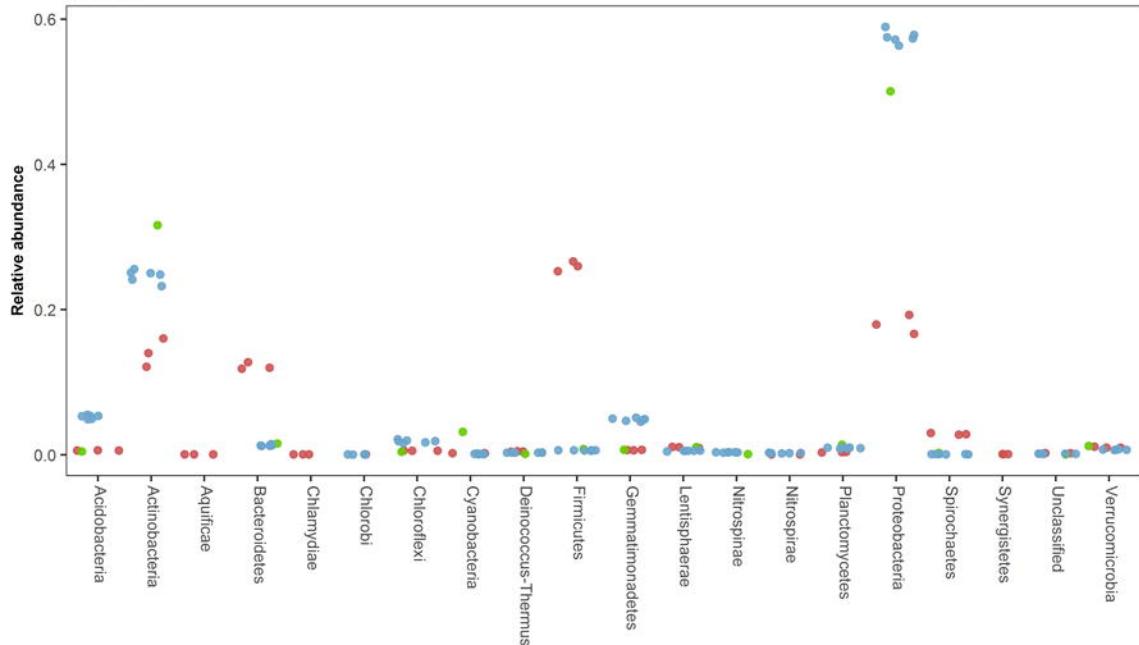

### Archaea

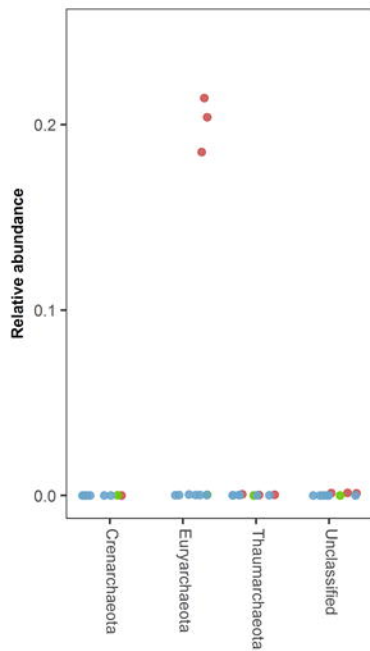

### Eukarya

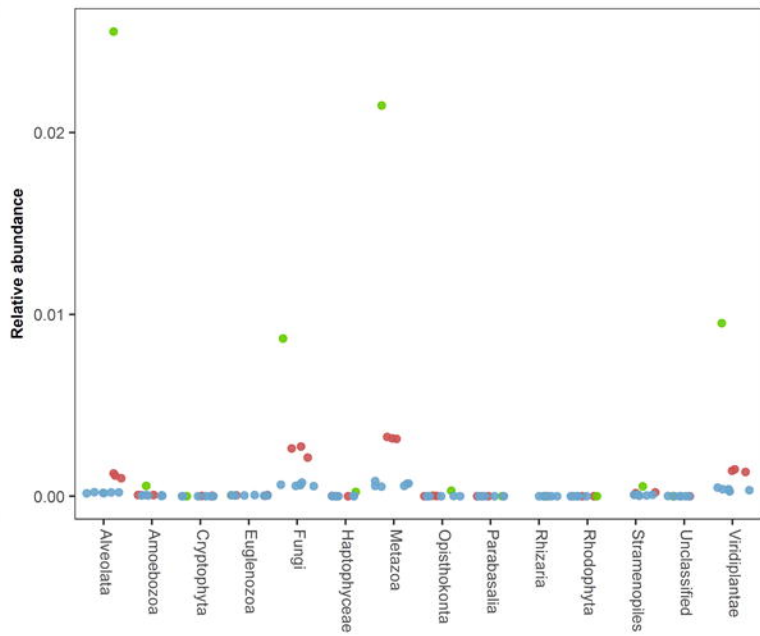

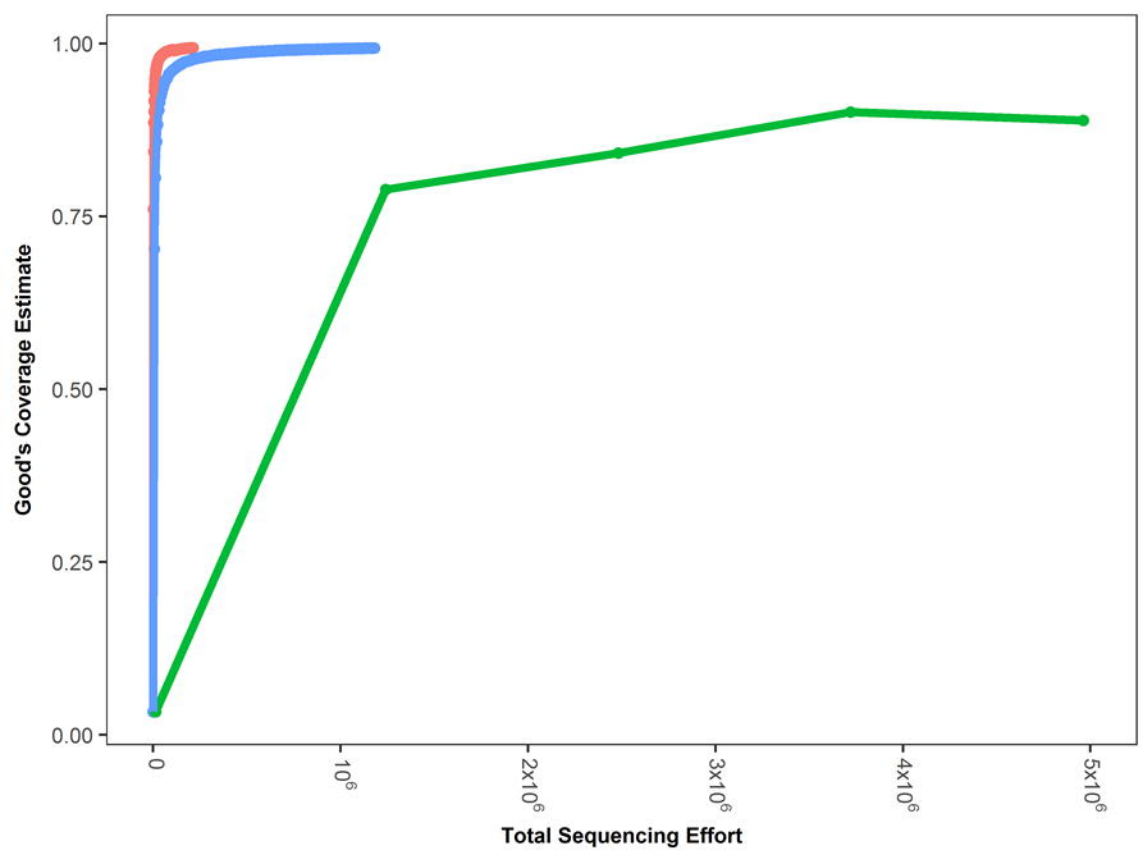

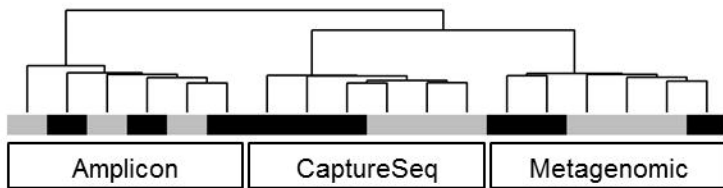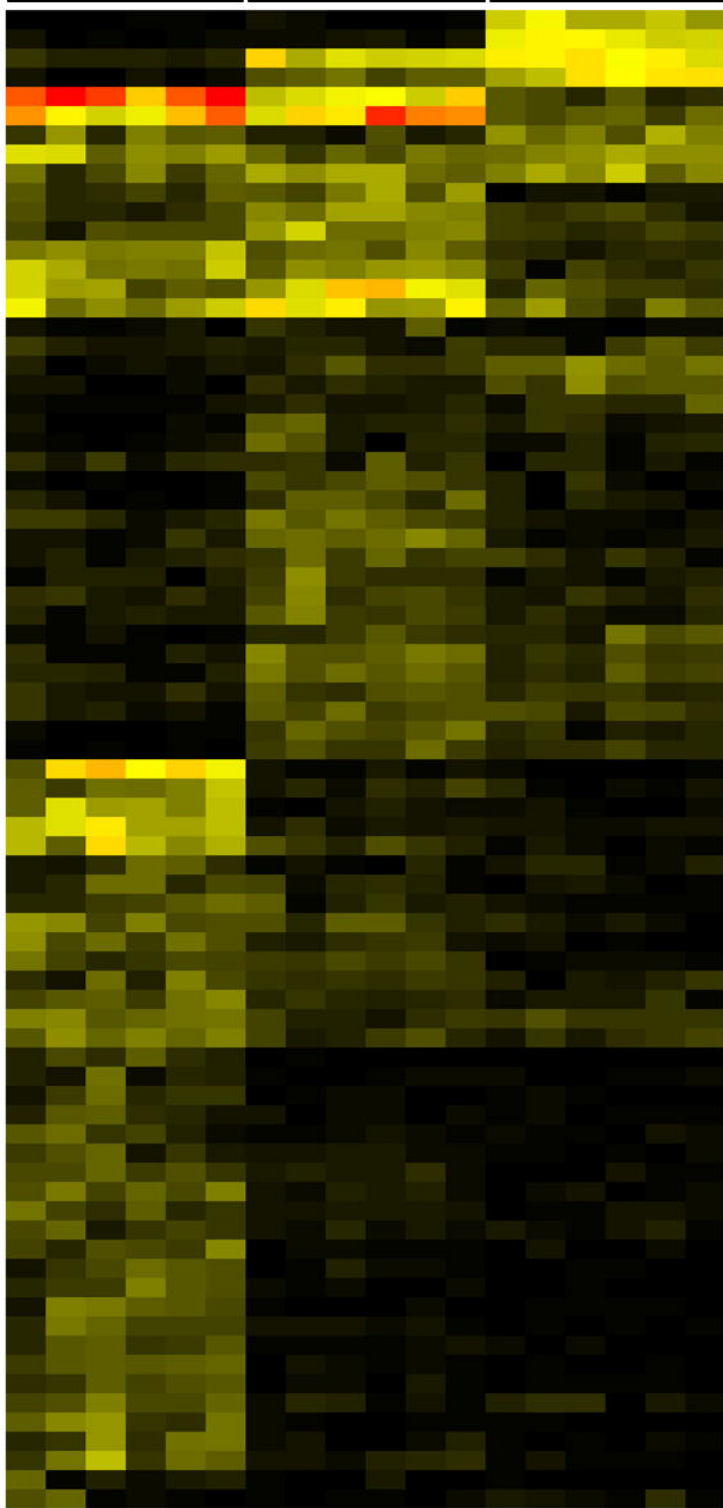

Mesorhizobium  
 Patulibacter  
 Solirubrobacter  
 Solirubrobacter  
 Gemmatimonadetes  
 Proteobacteria  
 Acidobacteriaceae  
 Gemmatirosa  
 Sphingomonas  
 Acidobacteria  
 Acidobacteria  
 Sphingomonas  
 Proteobacteria  
 Proteobacteria  
 Proteobacteria  
 Sphingomonas  
 Proteobacteria  
 Chondromyces  
 Gemmatirosa  
 Chloroflexi  
 Sorangium  
 Arenimonas  
 Luteimonas  
 Gemmatimonadetes  
 Actinobacteria  
 Actinobacteria  
 Proteobacteria  
 Actinobacteria  
 Desulfobulbus  
 Proteobacteria  
 Stigmatella  
 Arenimonas  
 Cystobacter  
 Actinobacteria  
 Actinobacteria  
 Rhodovulum  
 Chelatococcus  
 Nocardioides  
 Nocardioides  
 Acidobacteria  
 Microvirga  
 Acidobacteria  
 Acidobacteria  
 Sphingobium  
 Microcoleus  
 Proteobacteria  
 Proteobacteria  
 Proteobacteria  
 Actinobacteria  
 Gemmatimonadetes  
 Microvirga  
 Microvirga  
 Chthoniobacter  
 Sphingomonas  
 Proteobacteria  
 Acidobacteria  
 Acidobacteria  
 Acidobacteria  
 Caldimonas  
 Acidobacteria  
 Proteobacteria  
 Lentisphaerae  
 Pseudomonas  
 Porphyrobacter  
 Lentisphaerae  
 Acidobacteria  
 Gemmatimonadetes  
 Nitrospirae  
 Acidobacteria  
 Acidobacteria  
 Acidobacteria  
 Gemmatimonadetes  
 Pedosphaera  
 Acidobacteria  
 Gemmatimonadetes  
 Nitrospirae  
 Planctomycetes  
 Thiocapsa

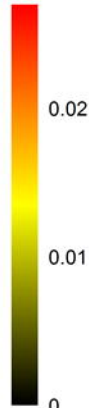

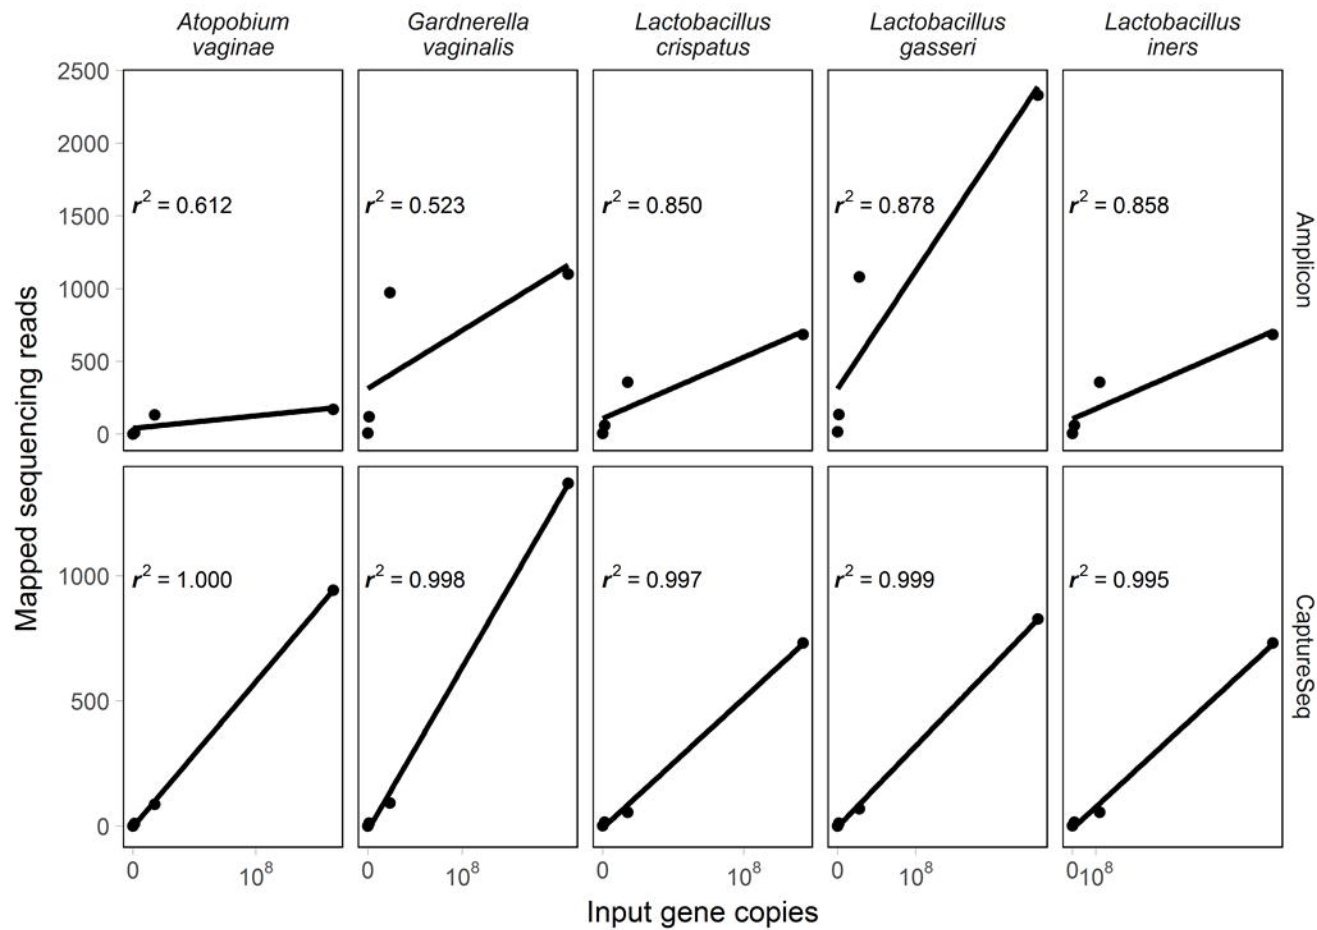

Source: http://biorxiv.org/content/10.1101/492116v1.full.pdf
